# Supplementary material
Source: Springer Nature journal article supplement (https://www.springermedizin.de/resource/supplementary/12885_2013_4350_MOESM10_ESM.pdf/9466100)

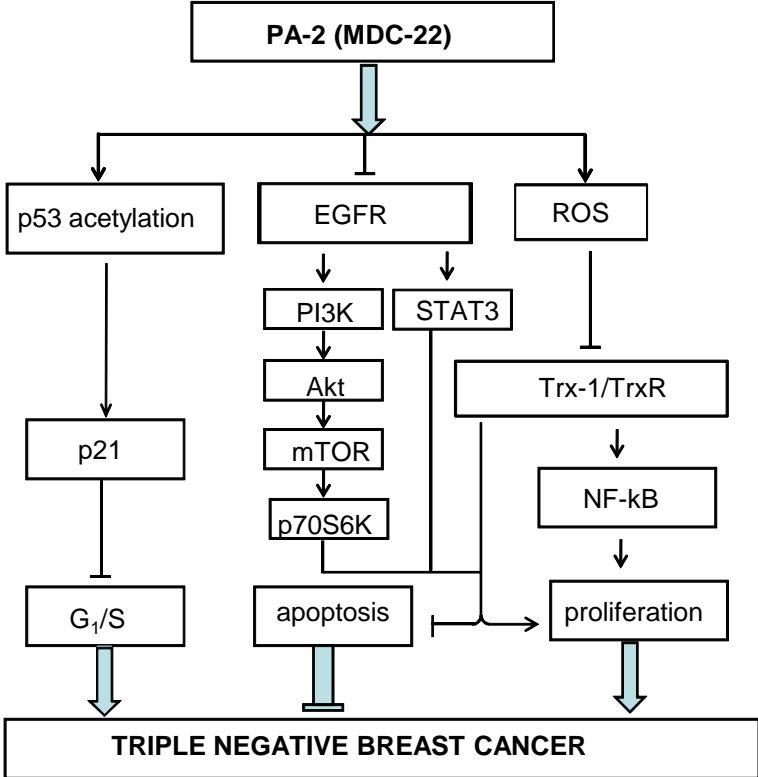

Supplement: MOESM10 [file 9466100]
